# Supplementary material for: cnvScan: a CNV screening and annotation tool to improve the clinical utility of computational CNV prediction from exome sequencing data
Source: PubMed Central journal article supplement (PMC4712464; doi:10.1186/s12864-016-2374-2), 2016-01-14
Supplement: 12864_2016_2374_MOESM1_ESM.pdf [file 12864_2016_2374_MOESM1_ESM.pdf]

**Table S1** Statistical methods used to calculate CNV quality scores

| <b>Program</b> | <b>Description</b>                                                              |
|----------------|---------------------------------------------------------------------------------|
| ExomeCopy      | Log of the odds ratio of predicted copy count over the normal copy count        |
| ExomeDepth     | Log of the likelihood ratio of the data for the predicted CNV over normal state |
| ExCopyDepth    | Log of the likelihood ratio of the data for the predicted CNV over normal state |
| XHMM           | Phred-scaled quality of not being diploid                                       |
| CoNIFER        | Hard threshold is used on normalized singular value decomposed-scores           |

**Table S2** CNVQ ratio for common TP CNVs.

| <b>Program</b>     | <b>Database CNV count</b> | <b>FP count</b> | <b>Common TP* count</b> | <b>CNVQ ratio</b> |
|--------------------|---------------------------|-----------------|-------------------------|-------------------|
| <b>ExCopyDepth</b> | 3                         | 16              | 5                       | 1.3               |
| <b>ExomeDepth</b>  | -                         | -               | -                       | -                 |
| <b>XHMM</b>        | 3                         | 28              | 3                       | 1.1               |
|                    | 4                         | 27              | 4                       | 1.1               |

CNVQ ratio = CNVQ of TP / CNVQ of FP

\*Common TP: TP CNVs which were reported in high-quality DGV, 1000 genomes CNVs and Sanger CNVs

In order to assess CNVQ ratio for common TP, all the TPs reported in public databases (high-quality DGV, 1000 genomes CNVs and Sanger CNVs) were identified as common TPs and used as queries to search the in-house database. FPs used in Figure 3 were used as FP queries in this analysis. Since Figure 3 indicated ineffective CNV quality score assignment for higher database CNV counts, we calculated CNVQ ratio for database counts > 2. ExomeDepth didn't predict any common TP CNV with database count > 2. Thus, CNVQ ratio for ExomeDepth was not calculated. CNVQ ratio (1.1-1.3) for common TPs (from ExCopyDepth and XHMM) confirmed that the quality scores were not useful in differentiating common TPs and FPs.

**Table S3** Format of the cnvScan input file

| <b>Column name</b>        | <b>Example</b>                     |
|---------------------------|------------------------------------|
| Chromosome                | 1, 2, 3... X, Y                    |
| End position of the CNV   | 1414393                            |
| Start position of the CNV | 1416351                            |
| CNV state                 | 0-1 (deletions), >2 (duplications) |
| CNV quality score         | 5.02                               |

Eg. First three lines of a cnvScan input file.

```
1 1414393 1416351 1 5.02
1 1573834 1573954 3 4.88
1 1637053 1643925 1 37.1
```

**Figure S1** Overview of cnvScan algorithm

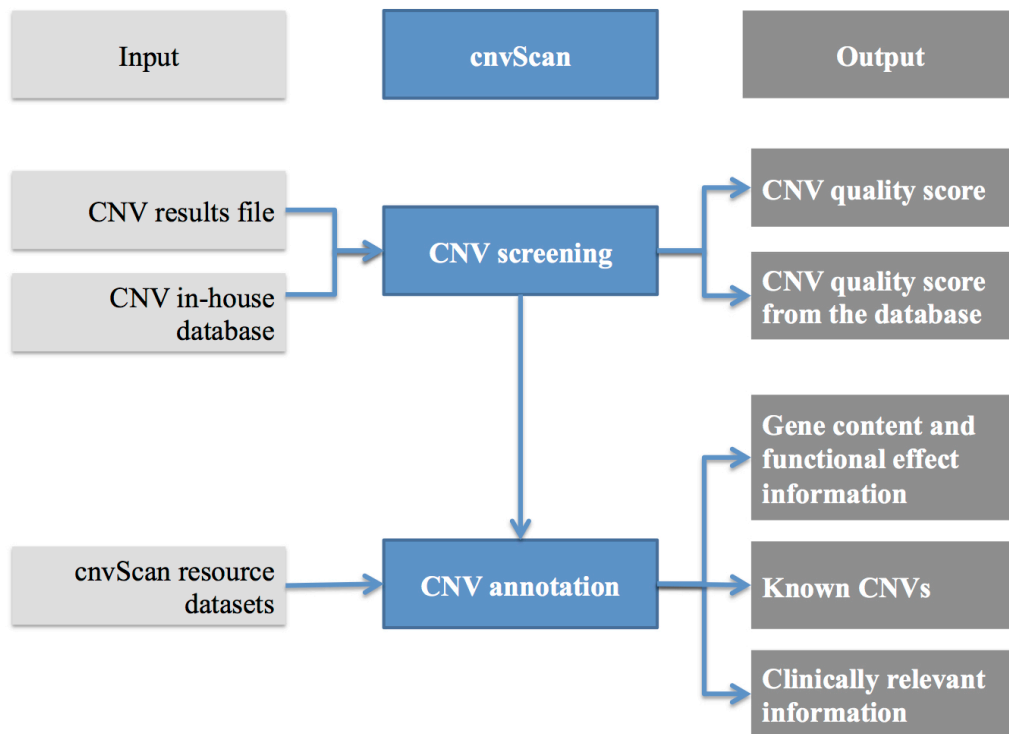

**Figure S2** CNV length vs Quality score for five CNV prediction programs

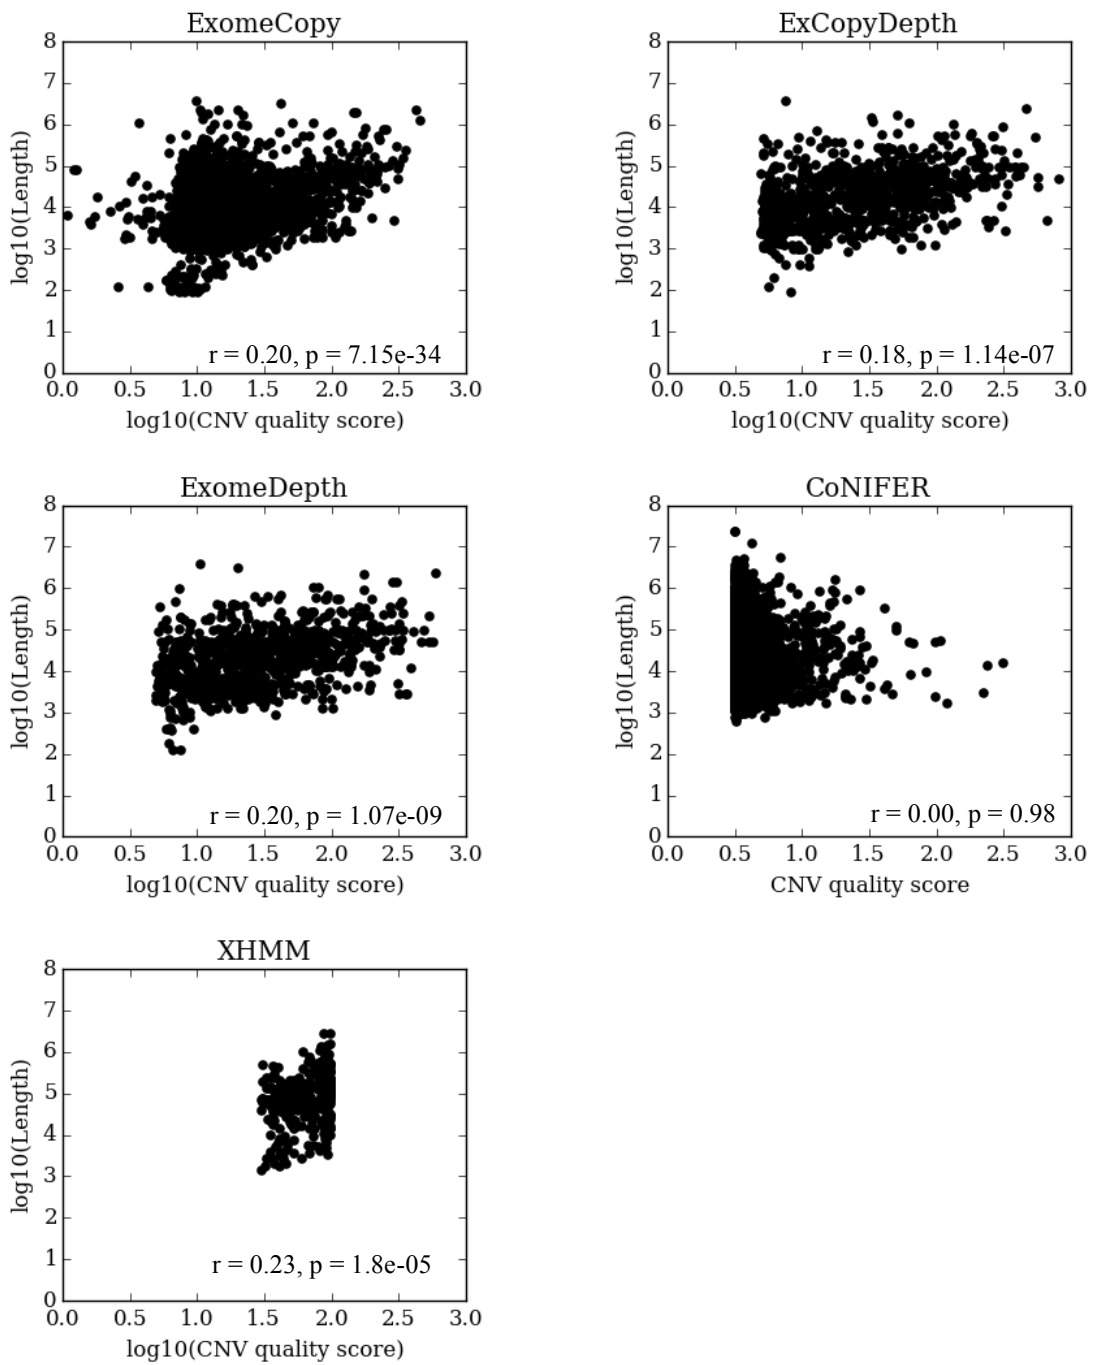

r: Pearson correlation coefficient  
p: P-value

**Figure S3** GC% vs Quality score for five CNV prediction programs

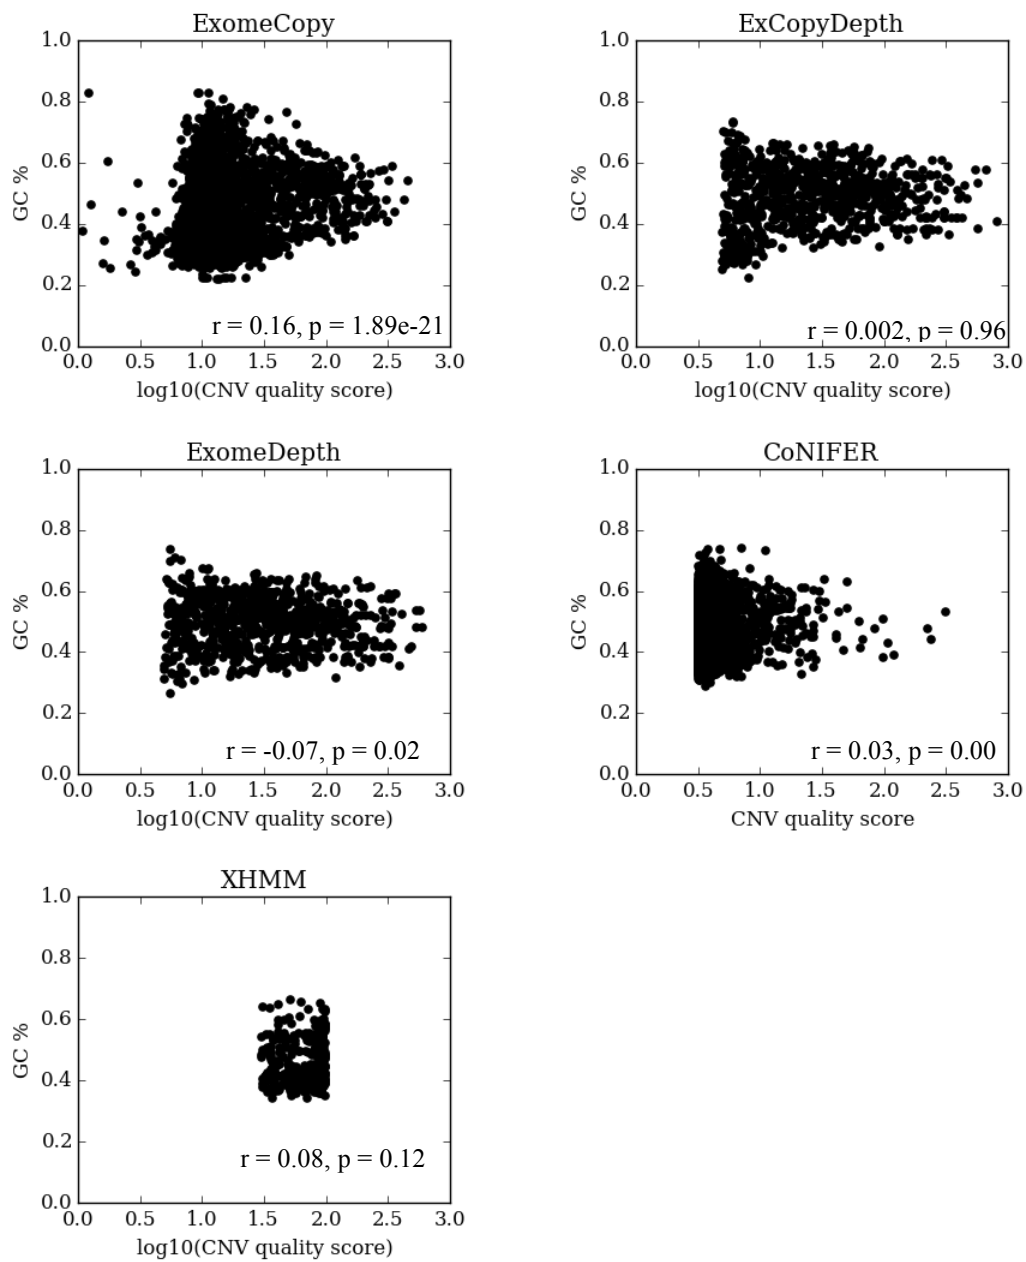

First, GC% of each exon is calculated using GATK toolkit (GCContentByInterval) and then mean GC content of exons internal to CNVs were calculated.

r: Pearson correlation coefficient

p: P-value

**Figure S4** Length of simple repeats internal to CNVs vs Quality score for five CNV prediction programs

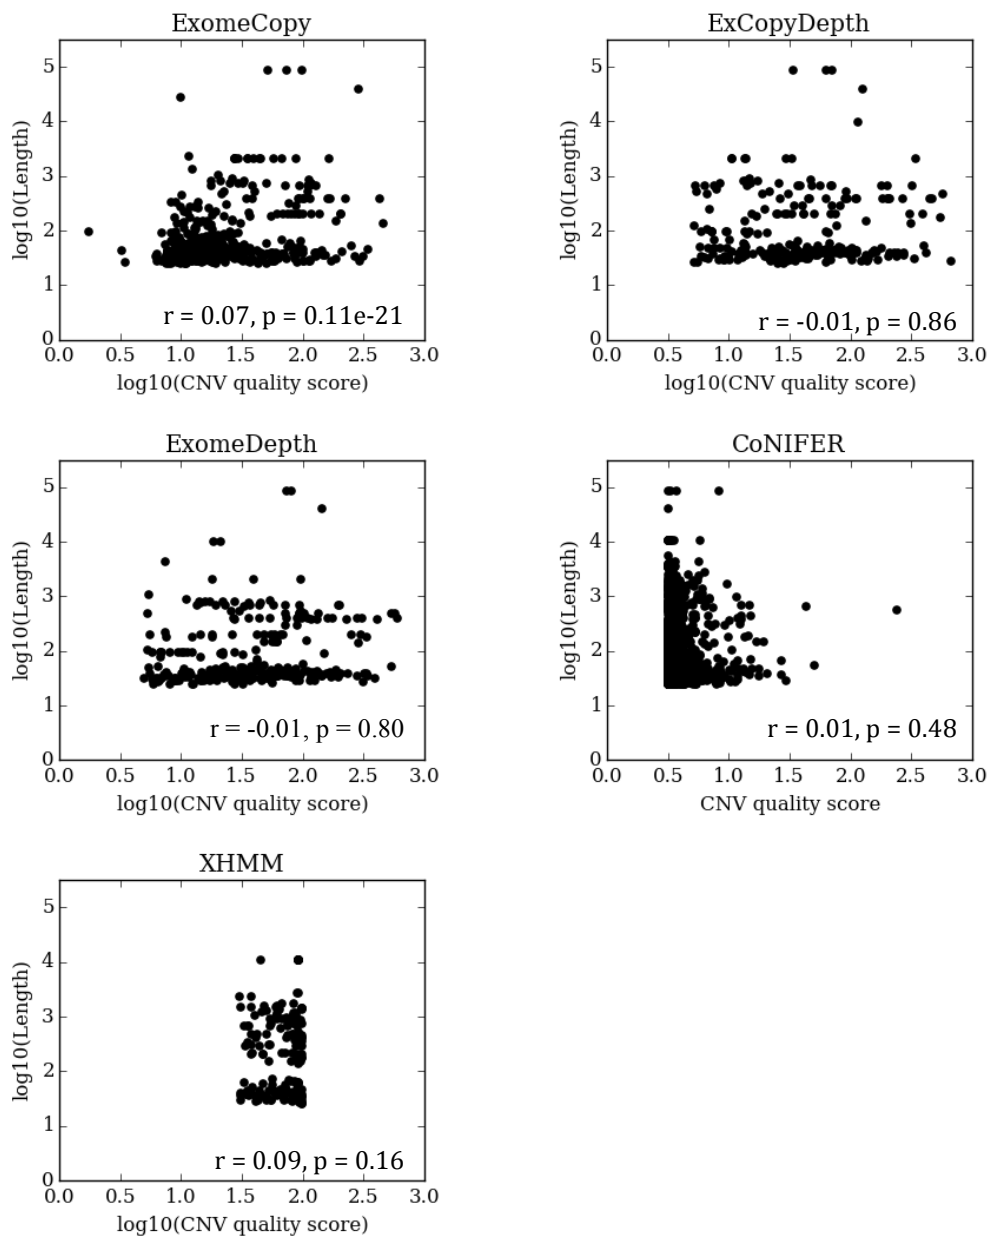

First, simple tandem repeats internal to exons were identified and then total length of simple repeats internal to each CNV was calculated.

Simple tandem repeats were obtained from: [http://genome.ucsc.edu/cgi-bin/hgTables?db=hg19&hgta\\_group=rep&hgta\\_track=simpleRepeat&hgta\\_table=simpleRepeat&hgta\\_doSchema=describe+table+schema](http://genome.ucsc.edu/cgi-bin/hgTables?db=hg19&hgta_group=rep&hgta_track=simpleRepeat&hgta_table=simpleRepeat&hgta_doSchema=describe+table+schema))

r: Pearson correlation coefficient

p: P-value

**Figure S5a** Coverage of duplications vs Quality score for five CNV prediction programs

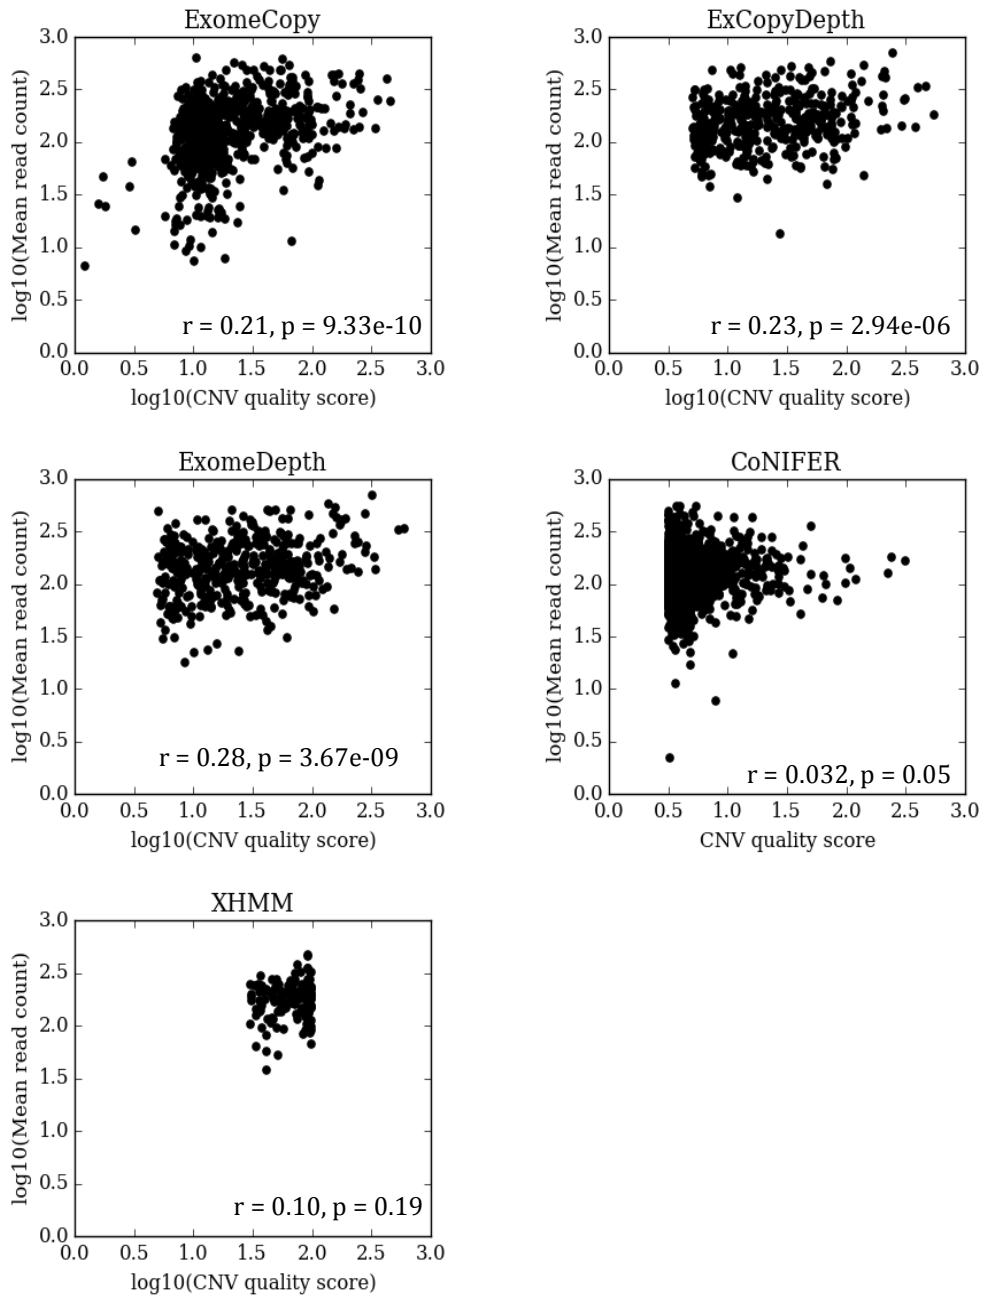

Average coverage (read depth) of CNVs were calculated using GATK toolkit (DepthOfCoverage)

r: Pearson correlation coefficient

p: P-value



**Figure S5b** Coverage of deletions vs Quality score for five CNV prediction programs

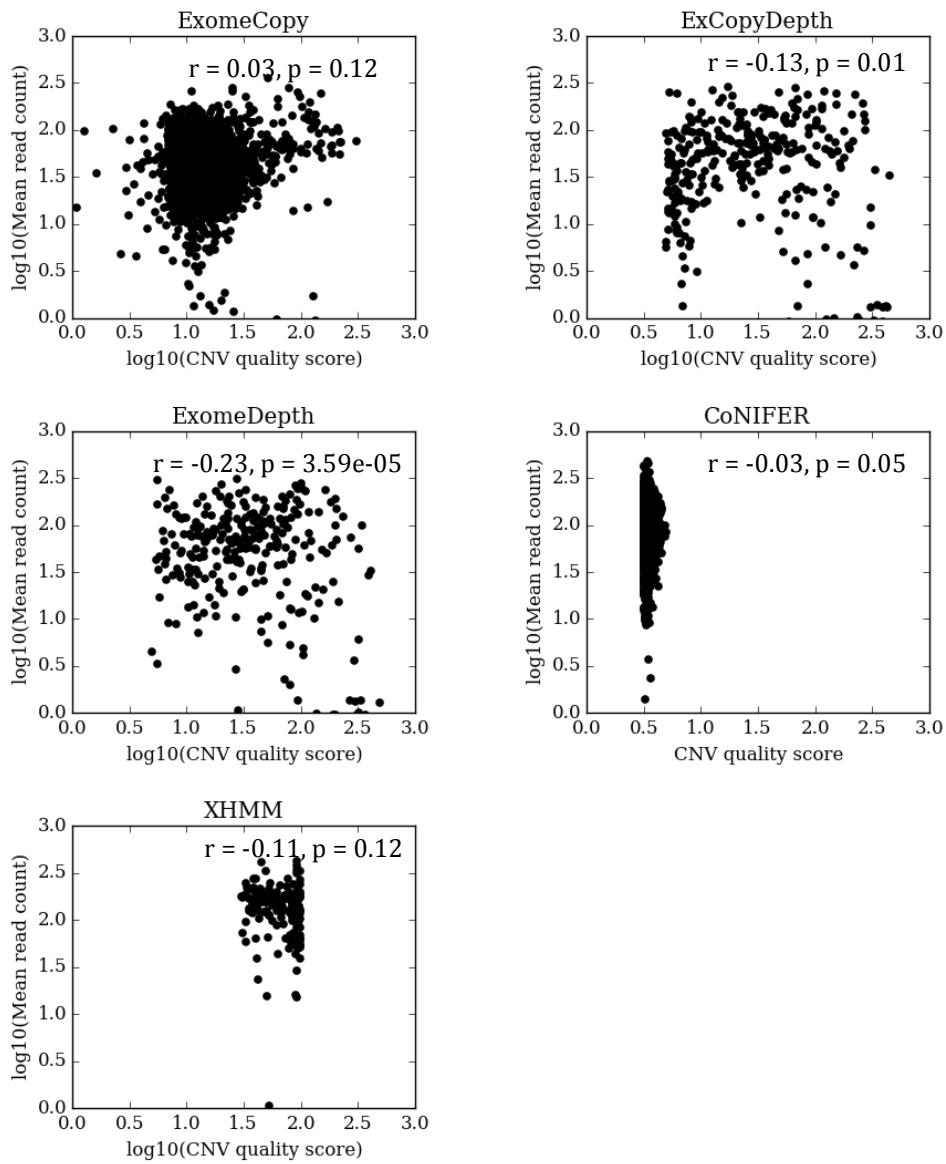

Average coverage (read depth) of CNVs were calculated using GATK toolkit (DepthOfCoverage)

r: Pearson correlation coefficient

p: P-value

**Figure S6** TP and FP counts in the in-house CNV database

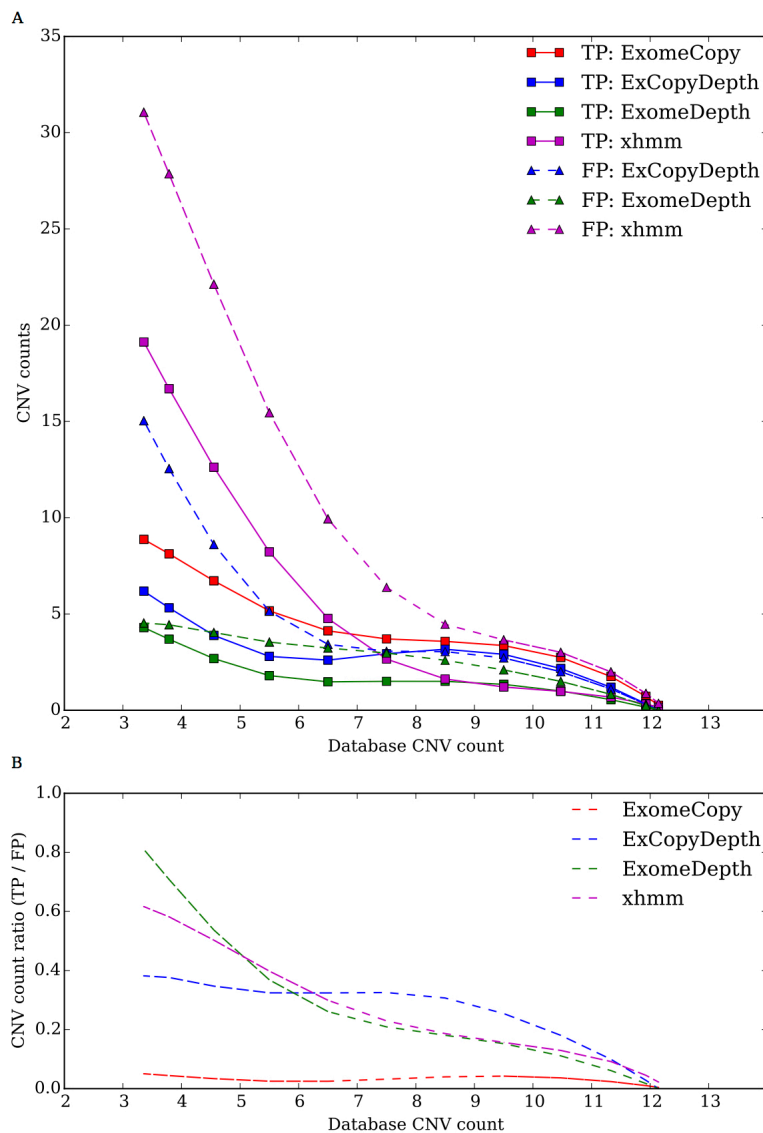

**a. TP and FP CNV counts vs database counts (count distribution for TP and FP CNVs)**

Database CNV count represents the number of samples in which TP or FP CNVs are predicted. FP counts were higher than the TP counts for all the prediction programs. Thus confirms the high FP CNV prediction in these programs. FP counts of ExomeCopy were ranging from 100-200 for all the database CNV counts, thus ExomeCopy FP counts were not presented in Additional file 1: Figure 6a.

**b. CNV count ratio vs Database CNV counts**

$$\text{CNV count ratio} = \frac{\text{TP CNV count}}{\text{FP CNV count}}$$

CNV count ratio was  $< 1$  for all the prediction programs in the entire spectrum of X-axis indicated that the FPs were overrepresented in the database.

**Figure S7** Comparison of filtration efficiency using default quality score, CNVQ, database CNV count

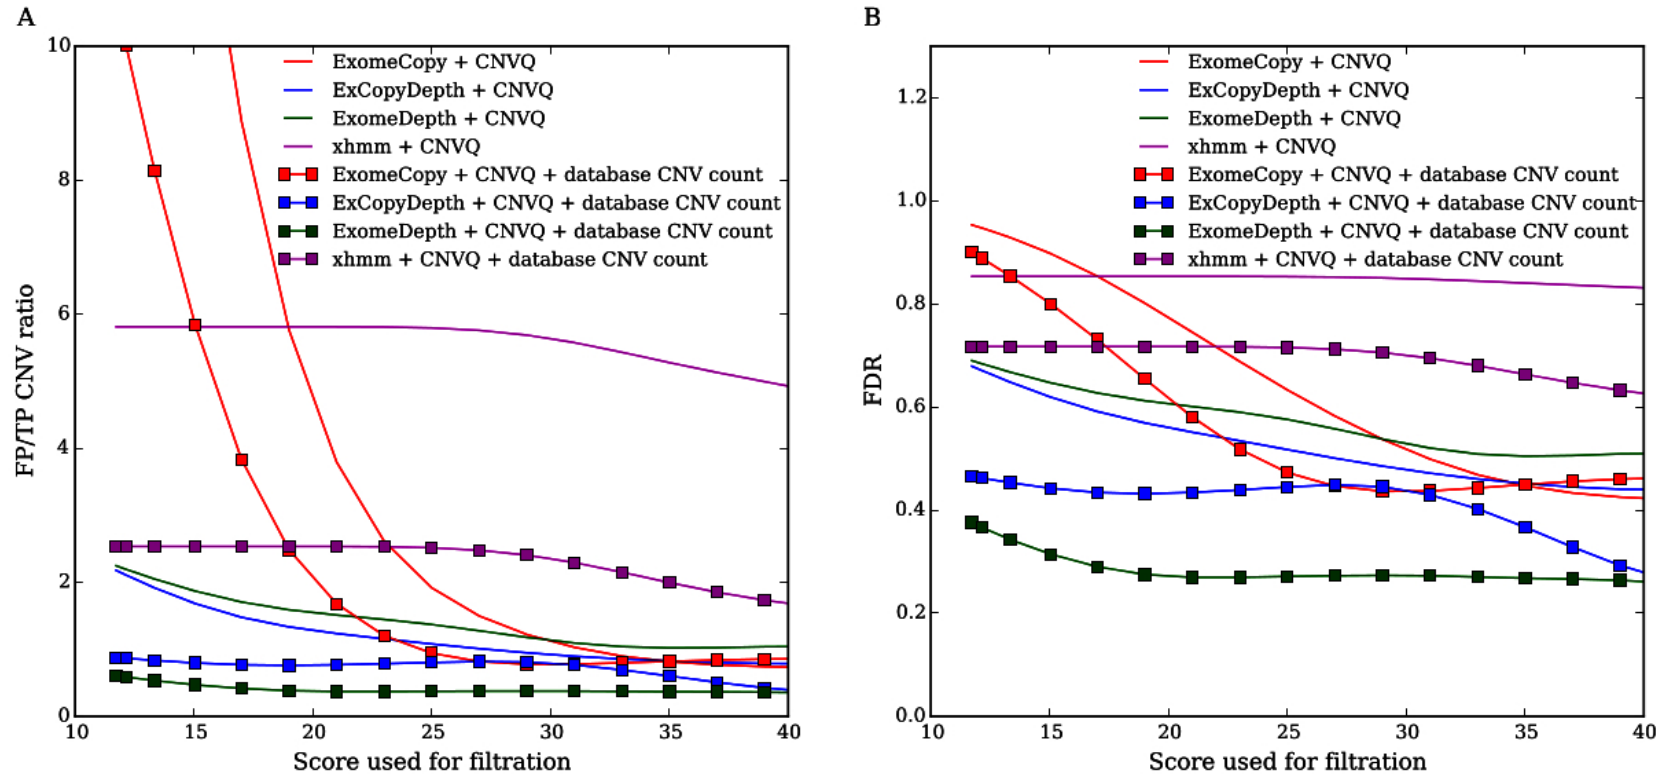

**a.** Comparison of cnvScan efficiency of four CNV prediction programs. Scores used for filtration: default CNV quality score from prediction programs and CNVQ from in-house database. FP/TP ratio: False positive CNV count/True positive CNV count. **b.** Comparison of the cnvScan efficiency in reducing FDR of four prediction programs (FDR of prediction programs vs cnvScan scores). FDR: False positive CNVs/(True positive CNVs + False positive CNVs). Hard threshold on database CNV count was used (database CNV count $\geq$ 5 were filtered-out) when CNVs were filtered with all three parameters. CoNIFER results were not filtered using cnvScan as CNVQ is not reported in the default state.

**Figure S8** Filtration efficiency of XHMM

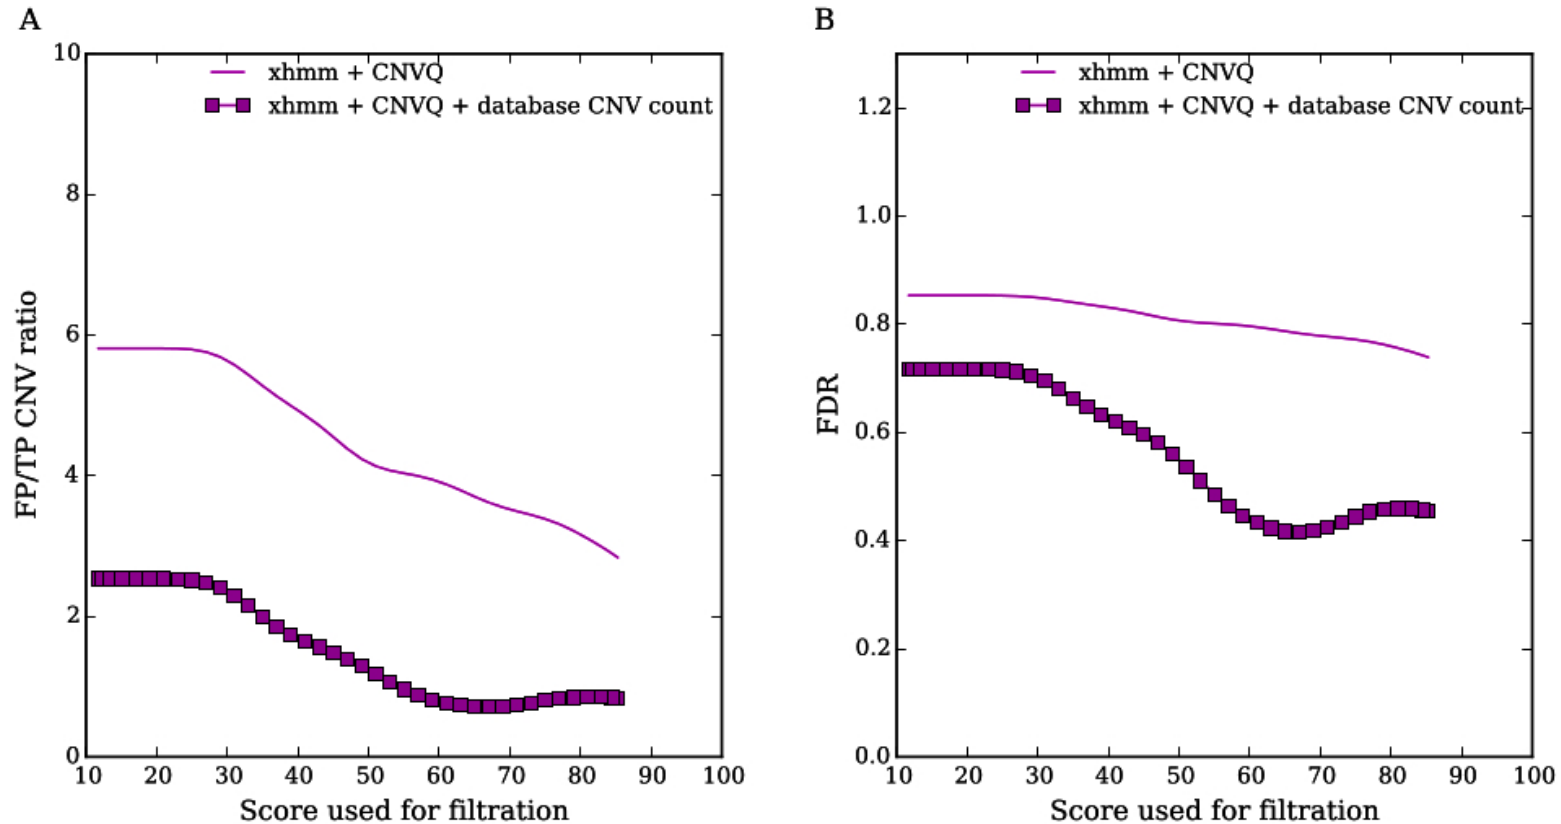

**a.** FP/TP CNV ratio vs cnvScan Scores. Scores used for filtration: default CNV quality score of XHMM and CNVQ from in-house database. **b.** FDR of XHMM vs cnvScan scores  
Hard threshold on database CNV count ( $\geq 5$ ) was used when CNVs were filtered with all three parameters (default CNV quality score of XHMM, CNVQ and database CNV count).

## **Text S1** In-house database creation.

The in-house database is an indexed flat file containing the chromosomal position of the CNV, CNV state, CNV quality score and the sample ID (sample identifier).

The following bash scripts can be used to create the database file from the cnvScan input file.

```
for f in $(find . -name "*<cnvScan input file>" -type f)
do
awk 'BEGIN{OFS="\t"} {print $0,substr(FILENAME,3,17)}' $f >> <database_file>
done

sort -k1,1 -k2n,2 -k3n,3 <database_file> > <database_file>.sorted.bed
bgzip <database_file>.sorted.bed
tabix -p bed <database_file>.sorted.bed.gz
```

Note, when a sample population is processed in different batches, a separate in-house database for each batch can be created to reduce the batch effect (sequencing artefacts in different batches).

## **Text S2** Thresholds used in CoNIFER and XHMM predictions

CoNIFER CNV prediction:

- SVD components to remove: 5
- SVD-ZRPKM threshold: 0.5

XHMM prediction:

- Exome-wide CNV rate: 1e-08
- Mean number of targets in CNV: 6
- Mean distance between targets within CNV (in KB): 70
- Mean of DELETION z-score distribution: -2.5
- Standard deviation of DELETION z-score distribution: 1
- Mean of DIPLOID z-score distribution: 0
- Standard deviation of DIPLOID z-score distribution: 1
- Mean of DUPLICATION z-score distribution: 2.5
- Standard deviation of DUPLICATION z-score distribution: 1
